# Supplementary material for: A Comparative Analysis of the Anatomy, Phenolic Profile, and Antioxidant Capacity of Tussilago farfara L. Vegetative Organs
Source: MDPI journal article supplement (doi:10.3390/plants11131663), 2022-06-23
Supplement: s1 [file s1]

# A comparative analysis of the anatomy, phenolic profile, and antioxidant capacity of *Tussilago farfara* L. vegetative organs

Viviane-Beatrice Bota<sup>1,2,3,†</sup>, Andreea-Adriana Neamtu<sup>2,4,†</sup>, Neli-Kinga Olah<sup>5,6</sup>, Elisabeta Chișe<sup>6</sup>, Ramona-Flavia Burtescu<sup>5</sup>, Flavia-Roxana Pripon Furtuna<sup>5</sup>, Alexandru-Sabin Nicula<sup>3,7</sup>, Carmen Neamțu<sup>2</sup>, Adrian-Marius Maghiar<sup>8</sup>, Lăcrămioara-Carmen Ivănescu<sup>1</sup>, Maria-Magdalena Zamfirache<sup>1</sup>, Endre Mathe<sup>2,9</sup>, and Violeta Turcuș<sup>2,3,\*</sup>

<sup>1</sup> Doctoral School of Biology, Faculty of Biology, “Alexandru Ioan Cuza” University of Iași, 700505 Iași, Romania; V.B.B. [viviane.beatrice@gmail.com](mailto:viviane.beatrice@gmail.com); L.C.I. [ivanescu@uaic.ro](mailto:ivanescu@uaic.ro); M.M.Z. [magda@uaic.ro](mailto:magda@uaic.ro)

<sup>2</sup> Faculty of Medicine and Life Sciences, “Vasile Goldiș” Western University of Arad, 310414 Arad, Romania; V.B.B., A.A.N. [aneamtu94@gmail.com](mailto:aneamtu94@gmail.com), C.N. [neamtu.carmen@uvvg.ro](mailto:neamtu.carmen@uvvg.ro), E.M. [endre.mathe@agr.unideb.hu](mailto:endre.mathe@agr.unideb.hu), V.T. [turcus.violeta@uvvg.ro](mailto:turcus.violeta@uvvg.ro)

<sup>3</sup> National Institute for Economic Research “Costin C. Kiritescu” of the Romanian Academy/ Centre for Mountain Economy (CE-MONT), 725700 Suceava, Romania; V.B.B., Al.-S.N. [sabin.nicula@ubbcluj.ro](mailto:sabin.nicula@ubbcluj.ro), V.T.

<sup>4</sup> Doctoral School of Biomedical Sciences, University of Oradea, 410081 Oradea, Romania; A.A.N.

<sup>5</sup> SC PlantExtrakt SRL, 407059 Rădaia, Cluj, Romania; N.K.O. [neliolah@yahoo.com](mailto:neliolah@yahoo.com), F.R.P.F. [flavia@plantextrakt.ro](mailto:flavia@plantextrakt.ro), R.F.B. [ramona.burtescu@plantextrakt.ro](mailto:ramona.burtescu@plantextrakt.ro)

<sup>6</sup> Faculty of Pharmacy, “Vasile Goldiș” Western University of Arad, 310414 Arad, Romania; N.K.O., E.C. [chise.elisabeta@uvvg.ro](mailto:chise.elisabeta@uvvg.ro)

<sup>7</sup> Centre for Research on Settlements and Urbanism, Faculty of Geography, Babeș-Bolyai University from Cluj-Napoca, 400006 Cluj-Napoca, Romania; Al.-S.N.

<sup>8</sup> Department of Surgical Disciplines, Faculty of Medicine and Pharmacy, University of Oradea, 410081 Oradea, Romania; A.M.M. [amaghiar@gmail.com](mailto:amaghiar@gmail.com)

<sup>9</sup> Institute of Nutrition, Faculty of Agricultural and Food Sciences and Environmental Management, University of Debrecen, H-4032 Debrecen, Hungary; E.M.

<sup>†</sup> These authors contributed equally to this work and are both considered first author.

\* Correspondence: V. T. [turcus.violeta@uvvg.ro](mailto:turcus.violeta@uvvg.ro)

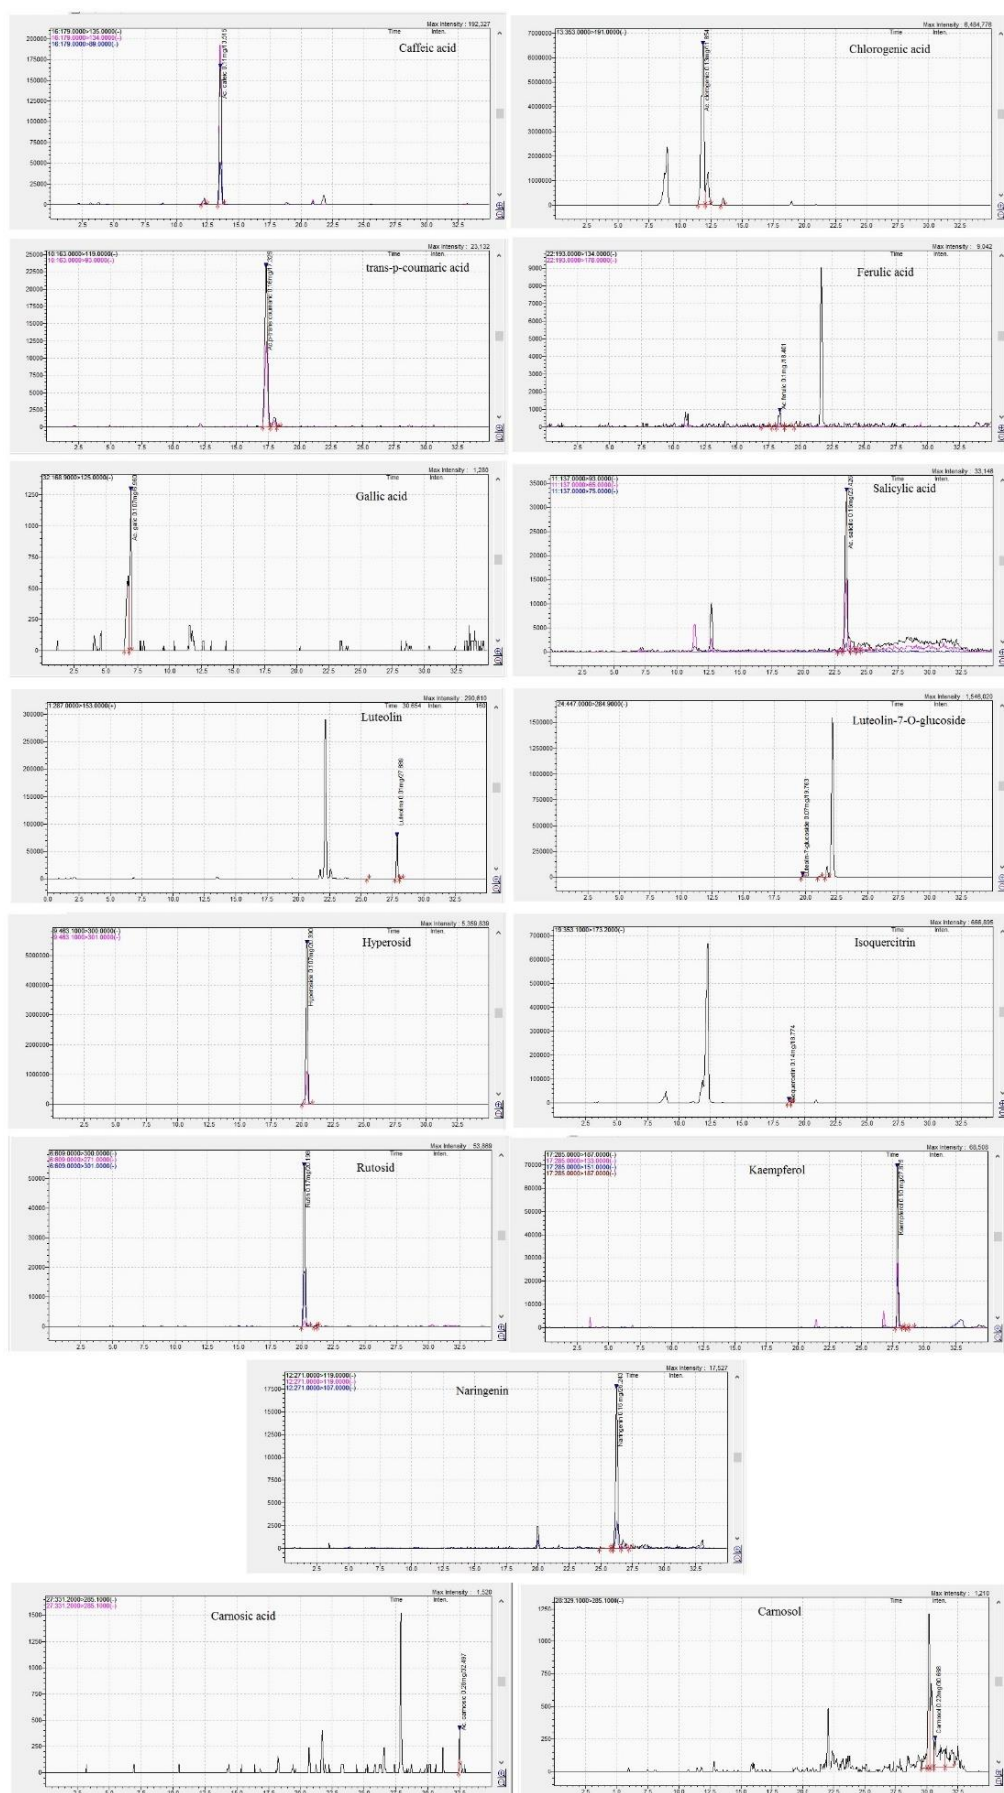

**Figure S1.** LC/MS chromatogram of the hydroalcoholic extract obtained from leaves of *T. farfara* L. from Rarău Mountains (RM).  
Compounds analysed

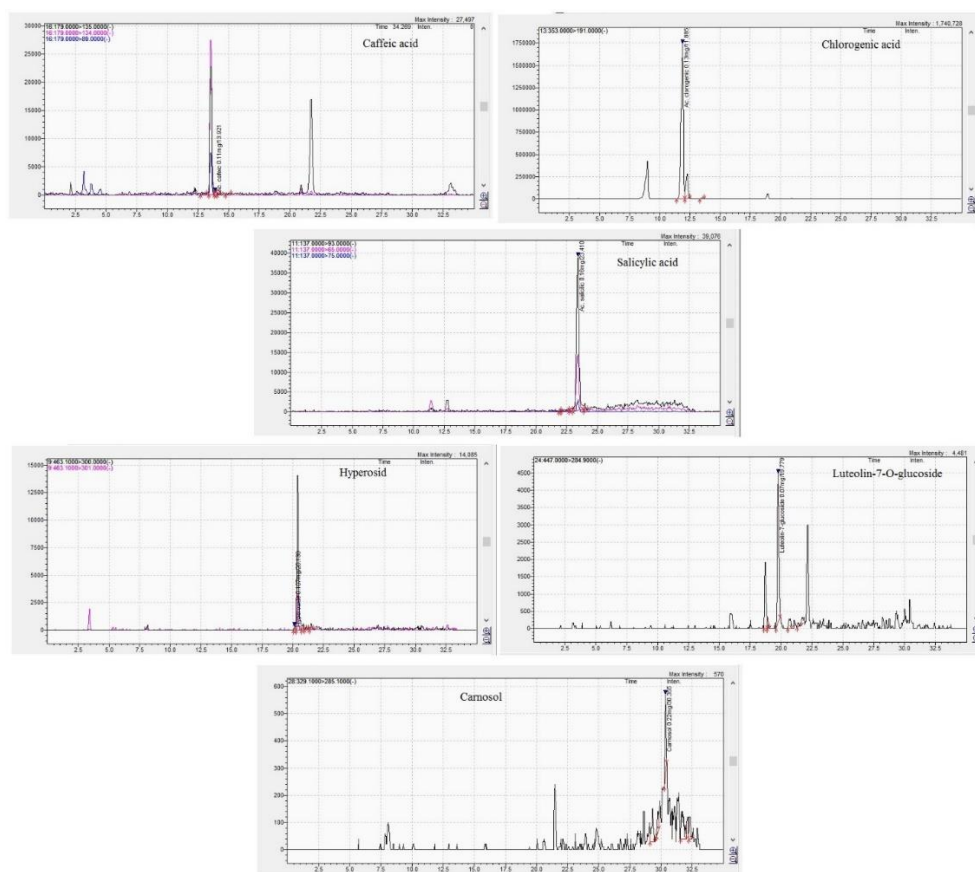

**Figure S2.** LC/MS chromatogram of the hydroalcoholic extract obtained from roots of *T. farfara* L. from Rarău Mountains (RM).

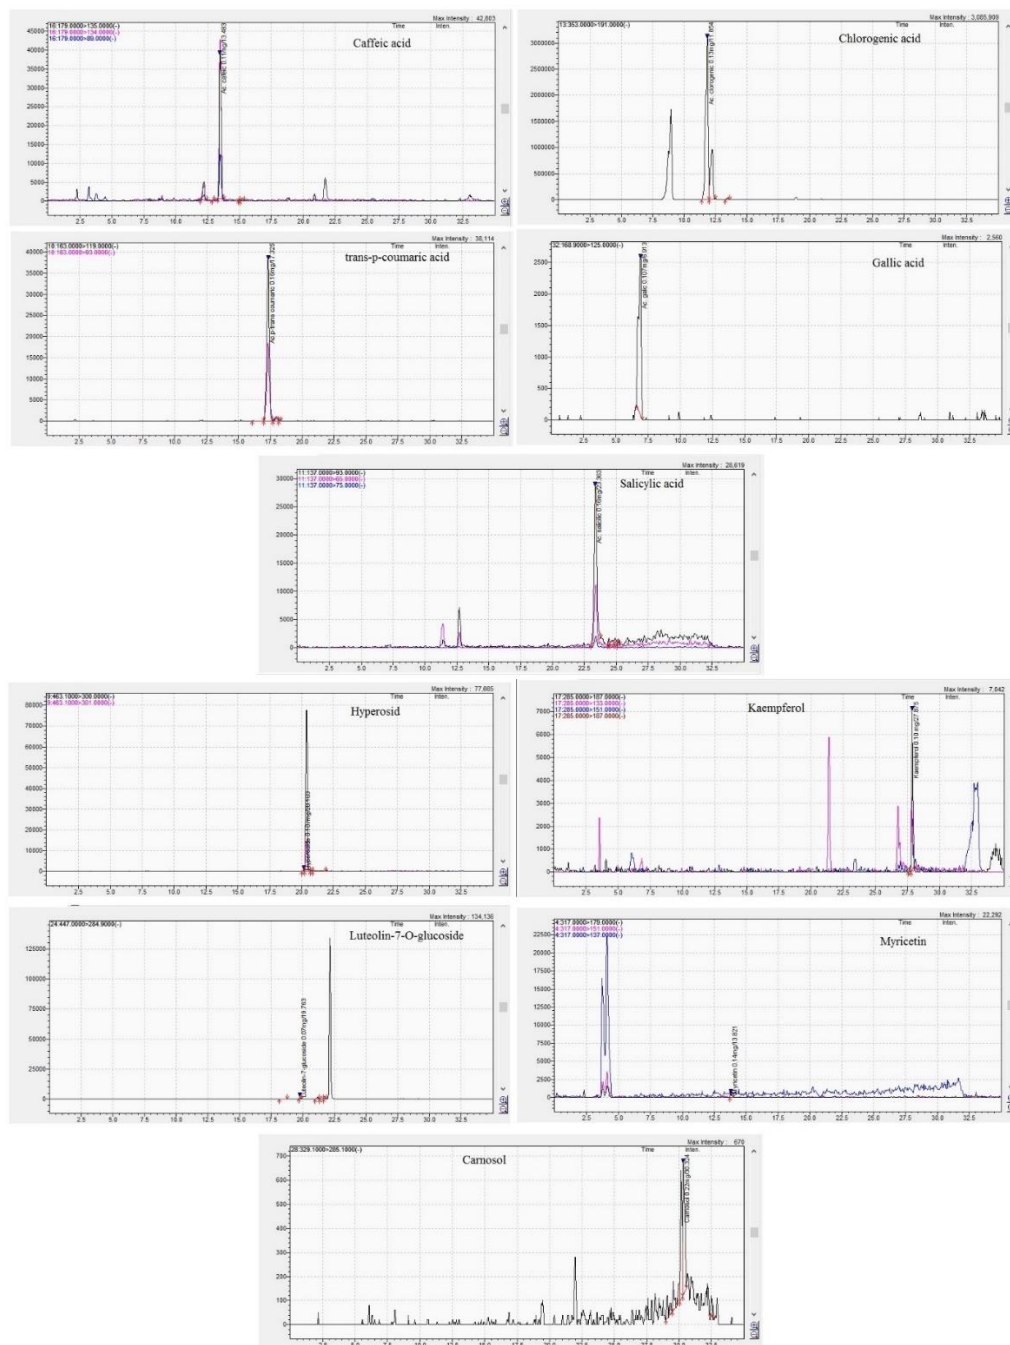

**Figure S3.** LC/MS chromatogram of the hydroalcoholic extract obtained from leaves of *T. farfara* L. from Vatra Dornei (VD).

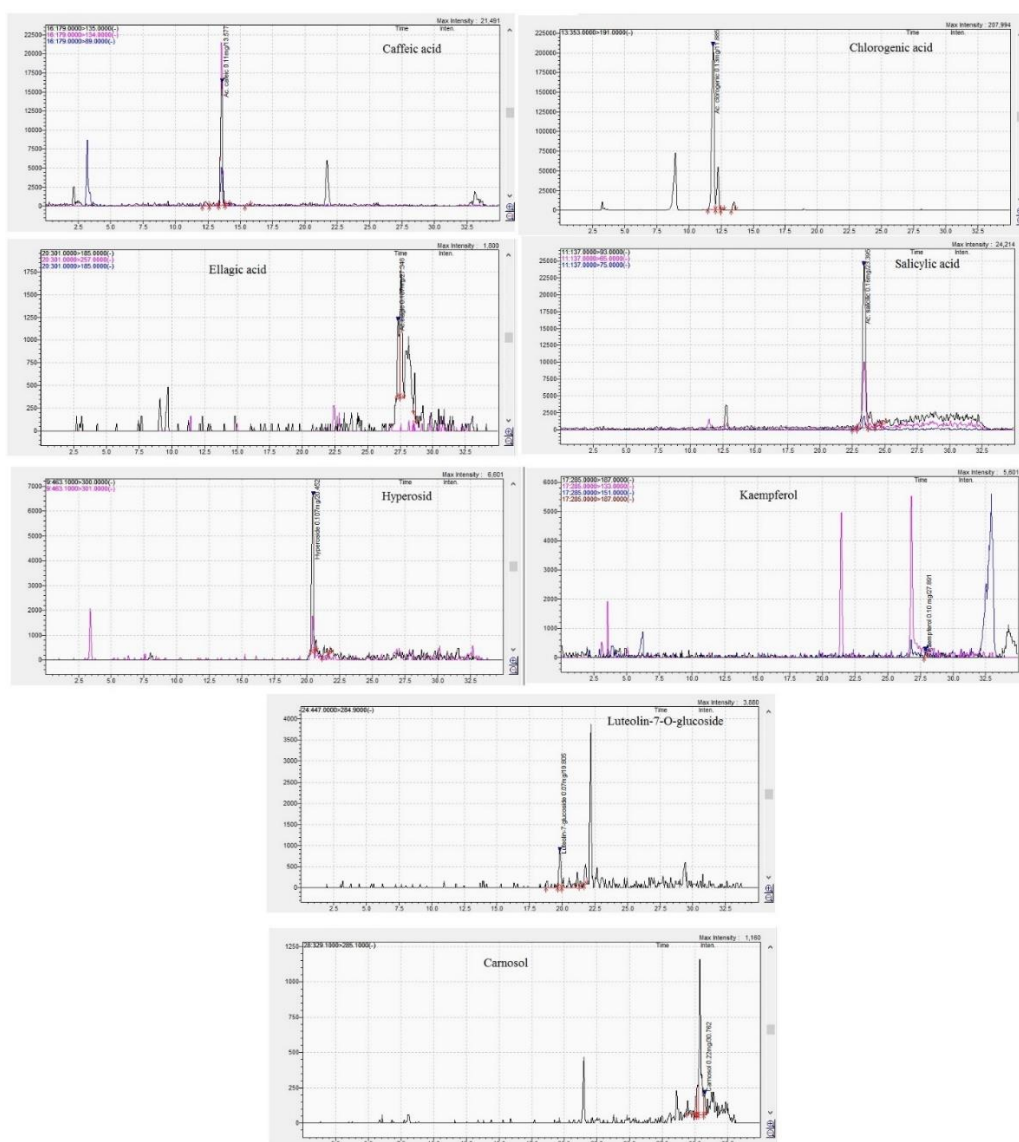

**Figure S4.** LC/MS chromatogram of the hydroalcoholic extract obtained from roots of *T. farfara* L. from Vatra Dornei (VD).

**Table S1.** Antioxidant activity of *T. farfara* extracts and isolated phytochemicals. Summarized results of original articles sorted by the plant part responsible and the extraction method.

| Plant part  | Preparation                                       | Assay                                      | Results                                                                                                                                                                                | Ref. |
|-------------|---------------------------------------------------|--------------------------------------------|----------------------------------------------------------------------------------------------------------------------------------------------------------------------------------------|------|
| Flower buds | Isolated indole alkaloids and lignans             | 2,2-Diphenyl-1-picrylhydrazyl (DPPH) assay | DPPH radical scavenging activity with IC <sub>50</sub> values of 45.2 ± 2.9 and 29.2 ± 2.0 µM                                                                                          | [35] |
|             | Ethyl acetate fraction                            | Lipid peroxidation, DPPH assay,            | Inhibition of lipid peroxidation by Fe <sup>2+</sup> and ascorbic acid in rat brain homogenates (IC <sub>50</sub> = 6.3 mg/mL), DPPH scavenging activity 50 % at 14.3mg/mL             | [36] |
|             | Ethylacetate soluble fraction, isolated compounds | Nitroblue tetrazolium (NBT) assay          | Ethyl acetate extract IC <sub>50</sub> = 1.8 µg/mL<br>quercetin-3-O-β-L-arabinopyranoside - IC <sub>50</sub> = 12.9 µM; quercetin-3-O-β-D-glucopyranoside - IC <sub>50</sub> = 35.6 µM | [37] |



|                    |                                                      |                                                                                                                      |                                                                                                                                                                                                                                            |      |
|--------------------|------------------------------------------------------|----------------------------------------------------------------------------------------------------------------------|--------------------------------------------------------------------------------------------------------------------------------------------------------------------------------------------------------------------------------------------|------|
|                    | Polysaccharides, water-soluble crude polysaccharides | Flow Injection Analysis paired with chemiluminescence (FIA-CL)                                                       | IC <sub>50</sub> ascorbic acid < IC <sub>50</sub> polysaccharides < IC <sub>50</sub> crude polysaccharides                                                                                                                                 | [38] |
|                    | Isolated compounds                                   | Nitric oxide inhibition assay, lipopolysaccharide-treated RAW 264.7 cells                                            | Nitric oxide inhibitory activity (3.5 µM ≤ IC <sub>50</sub> ≤ 28.5 µM)                                                                                                                                                                     | [39] |
|                    | Isolated compounds                                   | Nitric oxide inhibition assay, lipopolysaccharide-treated RAW 264.7 cells                                            | Dose-dependend nitric oxide inhibitory activity, from IC <sub>50</sub> = 10.80 µM                                                                                                                                                          | [40] |
|                    | Isolated compound                                    | Nitric oxide inhibition assay, lipopolysaccharide activated macrophages                                              | Nitric oxide synthesis inhibition by bisabolene epoxide compound                                                                                                                                                                           | [41] |
|                    | Isolated sesquiterpenoids                            | Lipopolysaccharide stimulated RAW 264.7 cells                                                                        | Nitric oxide inhibitory activity                                                                                                                                                                                                           | [42] |
|                    | Isolated sesquiterpenoids                            | <i>In vitro</i> and <i>in vivo</i> in PC12 cells and Oxidopamine (6-OHDA)-induced mouse model of Parkinson's disease | Protective effect against hydrogen peroxide and 6-hydroxydopamine-induced cytotoxicity, upregulated heme oxygenase 1 (HO-1) through interaction with Kelch-like ECH-associated protein 1 (Keap1)                                           | [43] |
|                    | Isolated ECN sesquiterpenoid                         | <i>In vivo</i> study on partial sciatic nerve ligation induced peripheral neuropathic pain in albino mice            | Prevention of suppression of antioxidants such as glutathione, glutathione-S-transferase, catalase, superoxide dismutase, nuclear factor erythroid 2-related factor 2 (Nrf2), hemeoxygenase-1 and NAD(P)H-dependent quinone oxidoreductase | [44] |
| Leaves and flowers | Methanol extract                                     | DPPH                                                                                                                 | Leaves antioxidant activty IC <sub>50</sub> = 55 µg/mL                                                                                                                                                                                     | [14] |
| Leaves             | Aqueous and hydro-ethanolic extracts                 | ABTS, DPPH                                                                                                           | Aqueous [µmol Trolox equivalent/g dry weight]: 320.80 (ABTS), 51.63 (DPPH); hydro-ethanolic [µmol Trolox equivalent/g dry weight]: 390.00D±1.13 (ABTS), 268.52D±1.06 (DPPH)                                                                | [12] |
|                    | Ethyl acetate (EtOAc), methanol, water (MeOH)        | ABTS, FRAP, CUPRAC, phosphomolybdenum, metal chelating assays                                                        | ABTS [mg Trolox equivalent/g dry weight]: EtOAc - 41.08; MeOH - 410.98; Water - 399.18                                                                                                                                                     | [45] |
|                    |                                                      |                                                                                                                      | FRAP [mg TE/g extract dry weight]: EtOAc - 49.98; MeOH - 465.31; Water - 380.25                                                                                                                                                            |      |
|                    |                                                      |                                                                                                                      | CUPRAC [mg TE/g extract dry weight]: EtOAc - 93.78; MeOH - 677.09; Water - 53.38                                                                                                                                                           |      |
|                    |                                                      |                                                                                                                      | Phosphomolybdenum [mg Trolox equivalent/g extract DW]: EtOAc - 1.54; MeOH - 2.26; Water - 1.44                                                                                                                                             |      |
|                    |                                                      |                                                                                                                      | Metal chelating [mg EDTA equivalent/g dry weight]: EtOAc - 13.11; MeOH - 6.16; Water - 4.98                                                                                                                                                |      |
|                    | Methanol extract                                     | DPPH                                                                                                                 | EC <sub>50</sub> = 14.54±0.72 µg/mL                                                                                                                                                                                                        | [46] |

|                  |                                        |                                           |                                                                                                                                                                                                        |      |
|------------------|----------------------------------------|-------------------------------------------|--------------------------------------------------------------------------------------------------------------------------------------------------------------------------------------------------------|------|
|                  | Ethanol extract                        | GC-MS with galvinoxyl free radical method | 80-100% inhibition, highest radical scavenging efficiency out of 8 tested species                                                                                                                      | [47] |
| Leaves and roots | Acetone, methanol and ethanol extracts | DPPH, ABTS, FRAP                          | Leaves showed higher antioxidant activity than roots, and Lithuanian samples higher than French samples                                                                                                | [48] |
| Unspecified      | Water and ethanol extracts             | DPPH, yeast model                         | Water - $198.9 \pm 0.71$ $\mu$ M ascorbate equivalent/g (DPPH); Ethanol - $113.5 \pm 0.00$ $\mu$ M ascorbate equivalent/g (DPPH); 20.9% inhibition of yeast oxidation by H <sub>2</sub> O <sub>2</sub> | [49] |
|                  | Methanol-water (8:2 v/v) extract       | ABTS, FRAP                                | $217.62 \pm 5.35$ $\mu$ mol Trolox equivalent/g dry weight (TEAC), $455.64 \pm 5.03$ $\mu$ mol Fe <sup>2+</sup> /g dry weight (FRAP)                                                                   | [50] |

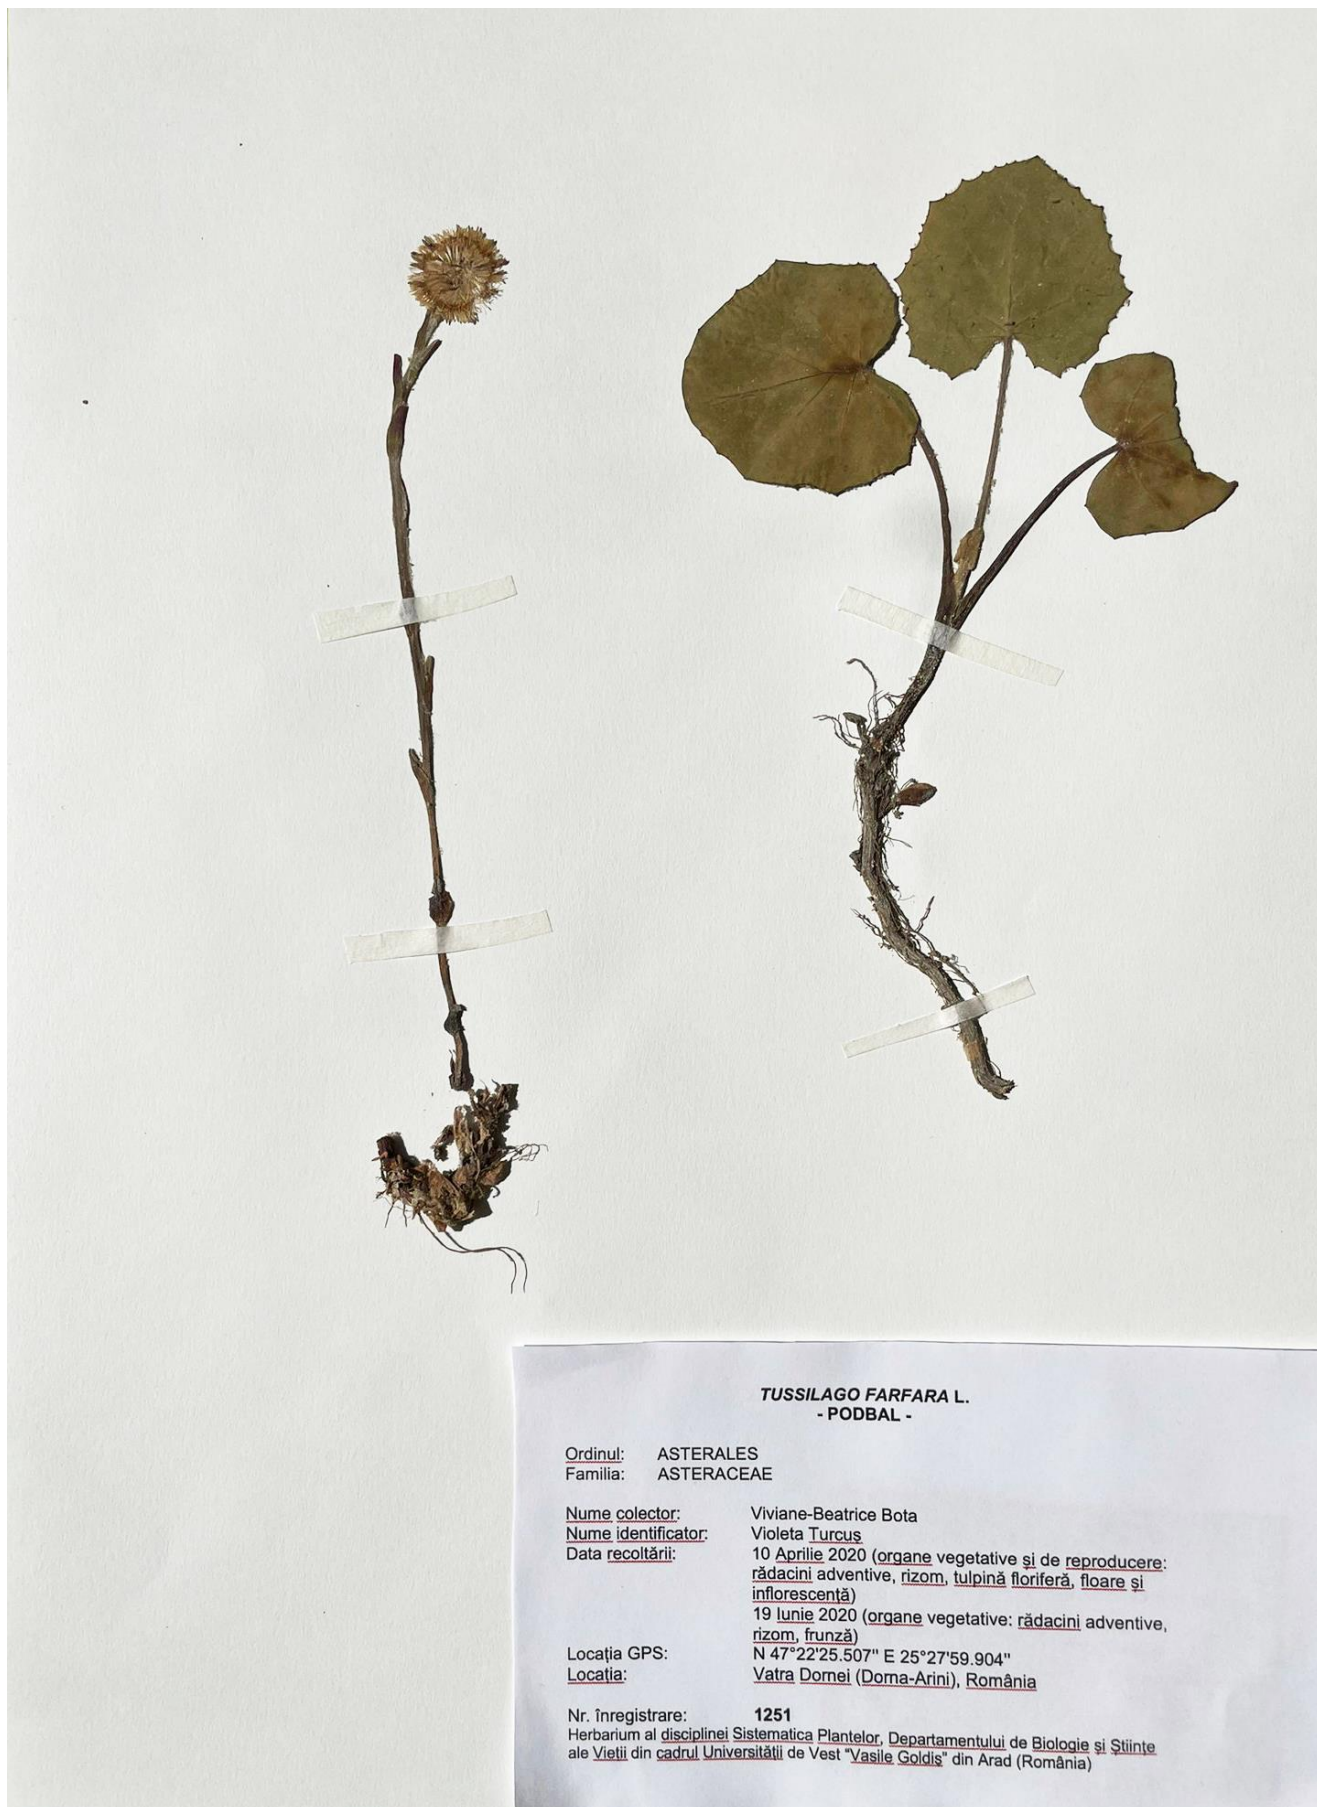

**Figure S5.** *Tussilago farfara* L. collected from Vatra Dornei. Registered with the voucher number 1251 in the Herbarium of the Plant Systematics discipline, part of the Department of Biology and Life Sciences of the "Vasile Goldiș" Western University of Arad (Romania).



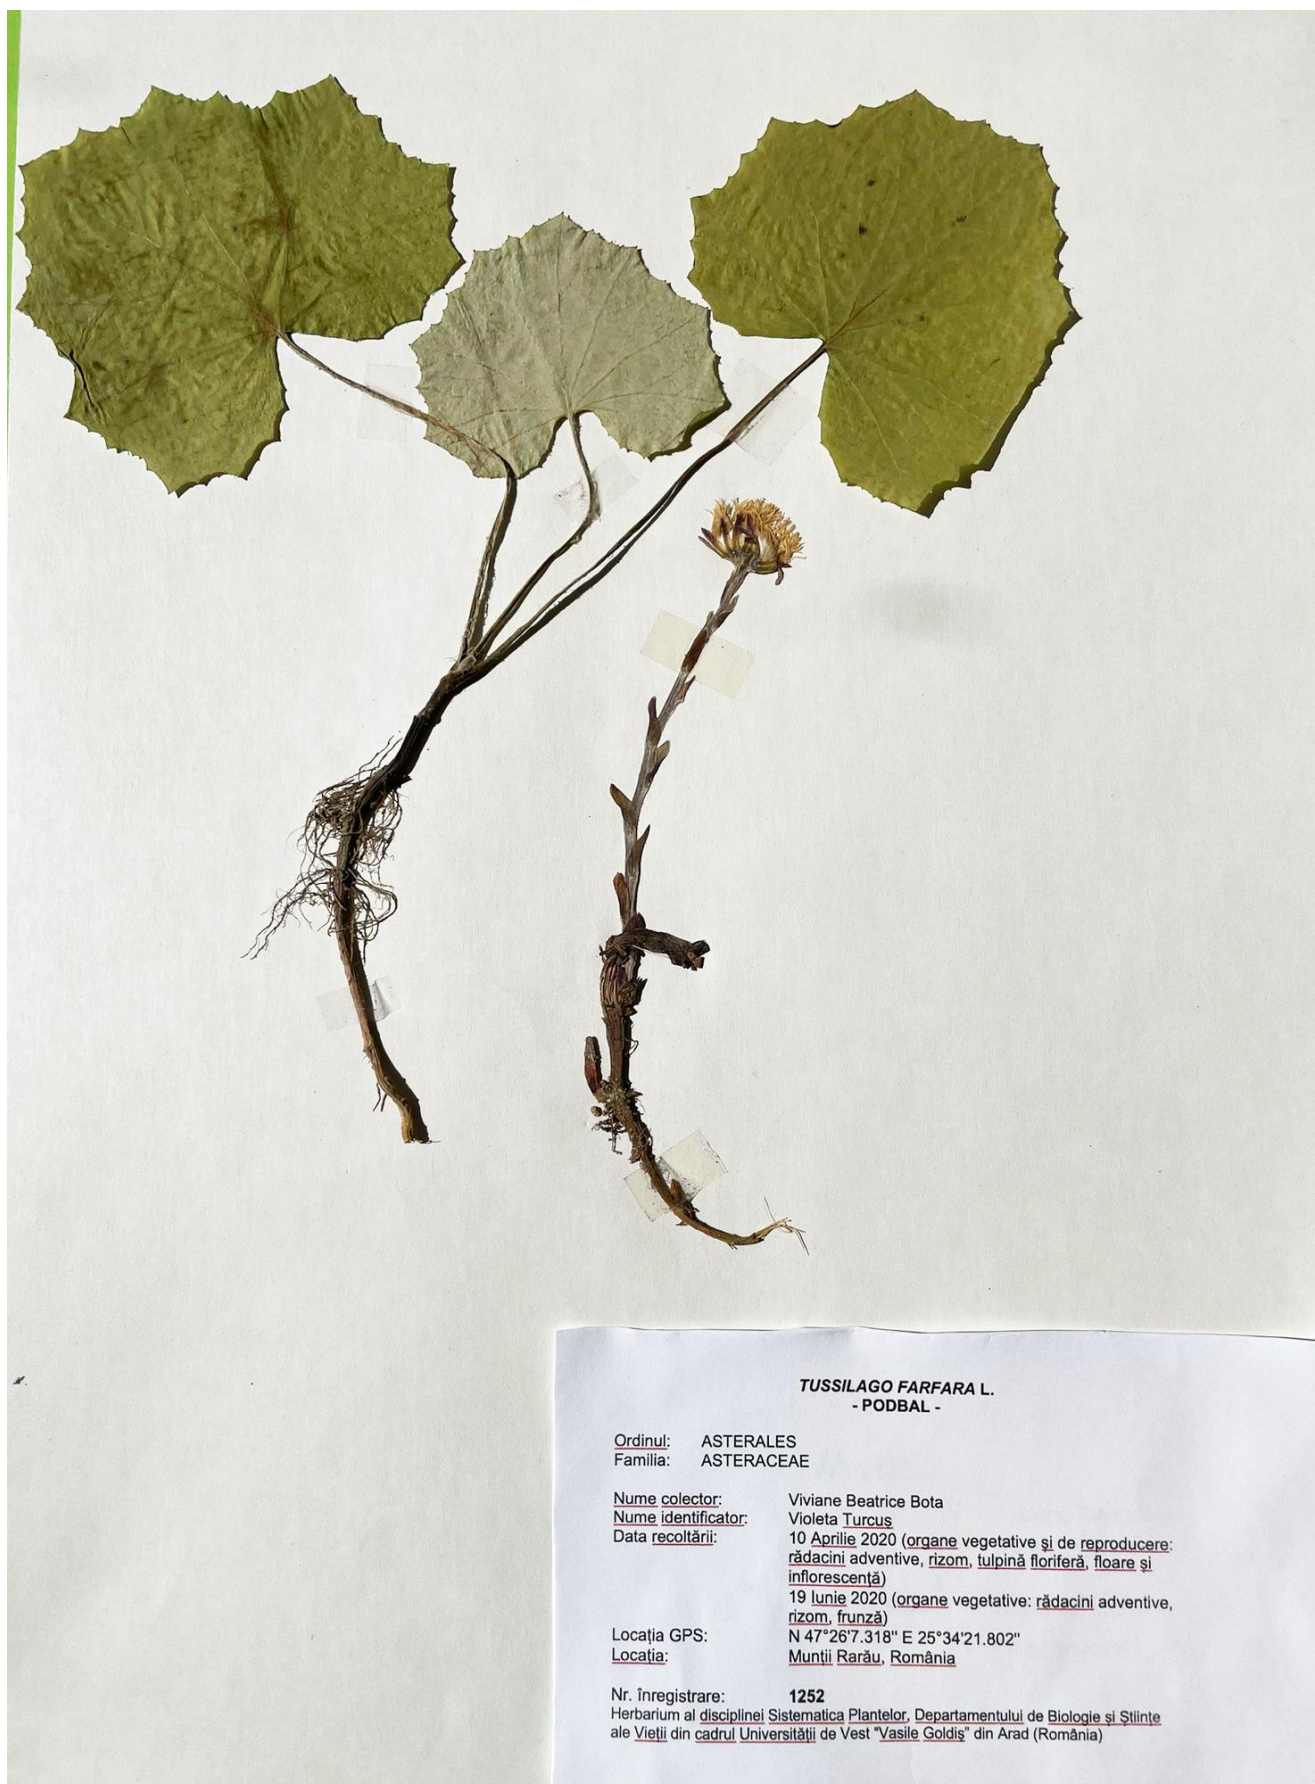

**Figure S6.** *Tussilago farfara* L. collected from Rarău Mountains. Registered with the voucher number 1252 in the Herbarium of the Plant Systematics discipline, part of the Department of Biology and Life Sciences of the "Vasile Goldiș" Western University of Arad (Romania).

**Table S2.** The standards for chromatographic and spectral data.

| Standard                        | Retention time, min | m/z – main transition | MRM      |
|---------------------------------|---------------------|-----------------------|----------|
| Caffeic acid                    | 13.8                | 179.0>135.0           | Negative |
| <i>trans-p</i> -coumaric acid   | 17.5                | 163.0>119.0           | Negative |
| Salicylic acid                  | 23.5                | 137.0>93.0            | Negative |
| Chlorogenic acid                | 12.0                | 353.0>191.0           | Negative |
| Apigenin                        | 28.2                | 269.0>117.0           | Negative |
| Chrysin                         | 29.7                | 253.0>143.0           | Negative |
| Luteolin                        | 26.9                | 287.0>153.0           | Positive |
| Luteolin-7- <i>O</i> -glucoside | 19.9                | 447.0>284.9           | Negative |
| Quercetin                       | 25.7                | 300.9>151.0           | Negative |
| Rutoside                        | 20.3                | 609.0>300.0           | Negative |
| Naringenin                      | 26.3                | 271.0>119.0           | Negative |
| Carnosic acid                   | 32.0                | 331.2>285.1           | Negative |
| Ellagic acid                    | 27.2                | 301.0>185.0           | Negative |
| Carnosol                        | 30.7                | 329.1>285.1           | Negative |
| Kaempferol                      | 28.0                | 285.0>187.0           | Negative |
| Myricetin                       | 13.6                | 317.0>179.0           | Negative |
| Hyperoside                      | 20.3                | 463.1>300.0           | Negative |
| Isoquercitrin                   | 17.9                | 353.1>173.2           | Negative |
| Ferulic acid                    | 18.4                | 193.0>134.0           | Negative |
| Gallic acid                     | 7.0                 | 168.9>125.0           | Negative |

**Table S3.** The standards used for LC/MS analyses.

| Standard                      | Origin                                     | Concentration range [mg/mL] | Calibration curve equation                                            | Correlation factor | Detection limit [µg/mL] | Quantification limit [µg/mL] |
|-------------------------------|--------------------------------------------|-----------------------------|-----------------------------------------------------------------------|--------------------|-------------------------|------------------------------|
| Caffeic acid                  | Phytolab,<br>Vestenbergsgreuth,<br>Germany | 0.11 – 1.10                 | Area =<br>$4 \cdot 10^7 \cdot \text{conc} [\text{mg/mL}]$<br>- 319689 | 0.9998             | 3.20                    | 4.80                         |
| <i>trans-p</i> -coumaric acid | Phytolab,<br>Vestenbergsgreuth,<br>Germany | 0.16 – 1.60                 | Area =<br>$3 \cdot 10^7 \cdot \text{conc} [\text{mg/mL}]$<br>+ 291065 | 0.9993             | 1.90                    | 3.90                         |
| Salicylic acid                | Merck, Darmstadt,<br>Germany               | 0.16 – 1.60                 | Area =<br>$4 \cdot 10^7 \cdot \text{conc} [\text{mg/mL}]$<br>+ 44120  | 0.9997             | 1.50                    | 2.00                         |
| Chlorogenic acid              | Phytolab,<br>Vestenbergsgreuth,<br>Germany | 0.13 – 1.30                 | Area =<br>$2 \cdot 10^8 \cdot \text{conc} [\text{mg/mL}]$<br>- 269699 | 0.9997             | 5.00                    | 8.00                         |

|                               |                                            |               |                                                      |        |      |      |
|-------------------------------|--------------------------------------------|---------------|------------------------------------------------------|--------|------|------|
| <b>Apigenin</b>               | Phytolab,<br>Vestenbergsgreuth,<br>Germany | 0.10 – 0.98   | Area =<br>2*10 <sup>8</sup> *conc[mg/mL]<br>+ 15916  | 0.9999 | 0.20 | 0.30 |
| <b>Chrysin</b>                | Merck, Darmstadt,<br>Germany               | 0.10 – 1.00   | Area =<br>1*10 <sup>8</sup> *conc[mg/mL]<br>– 82818  | 0.9997 | 3.00 | 5.00 |
| <b>Luteolin</b>               | Phytolab,<br>Vestenbergsgreuth,<br>Germany | 0.01 – 0.10   | Area =<br>2*10 <sup>8</sup> *conc[mg/mL]<br>– 2295.4 | 0.9977 | 0.05 | 0.07 |
| <b>Luteolin-7-O-glucoside</b> | Phytolab,<br>Vestenbergsgreuth,<br>Germany | 0.07 – 0.70   | Area =<br>1*10 <sup>9</sup> *conc[mg/mL]<br>– 700317 | 0.9990 | 3.00 | 4.00 |
| <b>Quercetin</b>              | Phytolab,<br>Vestenbergsgreuth,<br>Germany | 0.09 – 0.91   | Area =<br>5*10 <sup>7</sup> *conc[mg/mL]<br>– 9556   | 0.9964 | 0.80 | 1.10 |
| <b>Rutoside</b>               | Phytolab,<br>Vestenbergsgreuth,<br>Germany | 0.17 – 1.70   | Area =<br>2*10 <sup>8</sup> *conc[mg/mL]<br>– 191937 | 0.9996 | 4.00 | 6.00 |
| <b>Naringenin</b>             | Phytolab,<br>Vestenbergsgreuth,<br>Germany | 0.16 – 1.60   | Area =<br>3*10 <sup>8</sup> *conc[mg/mL]<br>– 43443  | 0.9999 | 0.60 | 0.90 |
| <b>Carnosic acid</b>          | Phytolab,<br>Vestenbergsgreuth,<br>Germany | 0.28 – 2.80   | Area =<br>10 <sup>7</sup> *conc[mg/mL] –<br>99360    | 0.9994 | 4.00 | 6.00 |
| <b>Ellagic acid</b>           | Phytolab,<br>Vestenbergsgreuth,<br>Germany | 0.107 – 1.070 | Area =<br>14987*conc[mg/mL]<br>– 138.52              | 0.9982 | 3.70 | 5.50 |
| <b>Carnosol</b>               | Phytolab,<br>Vestenbergsgreuth,<br>Germany | 0.022-0.220   | Area =<br>10 <sup>9</sup> *conc[mg/mL] –<br>253279   | 0.9997 | 1.00 | 2.00 |
| <b>Kaempferol</b>             | Phytolab,<br>Vestenbergsgreuth,<br>Germany | 0.10 – 1.00   | Area =<br>10 <sup>7</sup> *conc[mg/mL] –<br>20574    | 0.9996 | 0.80 | 1.20 |
| <b>Myricetin</b>              | Phytolab,<br>Vestenbergsgreuth,<br>Germany | 0.140 – 1.400 | Area =<br>26499*conc[mg/mL]<br>– 41.803              | 0.9997 | 0.60 | 0.90 |
| <b>Hyperoside</b>             | Phytolab,<br>Vestenbergsgreuth,<br>Germany | 0.012 – 0.107 | Area =<br>4*10 <sup>8</sup> *conc[mg/mL]<br>– 567182 | 0.9986 | 0.60 | 0.90 |
| <b>Isoquercitrin</b>          | Phytolab,<br>Vestenbergsgreuth,<br>Germany | 0.140 – 1.400 | Area =<br>4727*conc[mg/mL] +<br>68.172               | 0.9973 | 2.90 | 5.80 |

|                     |                                            |             |                                                                     |        |      |      |
|---------------------|--------------------------------------------|-------------|---------------------------------------------------------------------|--------|------|------|
| <b>Ferulic acid</b> | Phytolab,<br>Vestenbergsgreuth,<br>Germany | 0.100-1.000 | Area =<br>$5 \cdot 10^6 \cdot \text{conc}[\text{mg/mL}]$<br>– 50000 | 0.9992 | 4.00 | 6.00 |
| <b>Gallic acid</b>  | Phytolab,<br>Vestenbergsgreuth,<br>Germany | 0.107-1.070 | Area =<br>$8 \cdot 10^6 \cdot \text{conc}[\text{mg/mL}]$<br>– 37131 | 0.9999 | 1.90 | 2.80 |

**Table S4.** The spectral calibration curves data.

|                                                           | <b>Calibration curve equation</b>                                | <b>Correlation factor</b> |
|-----------------------------------------------------------|------------------------------------------------------------------|---------------------------|
| <b>Total flavonoids expressed in<br/>rutin</b>            | Absorption = $0.024 \cdot \text{conc}[\mu\text{g/mL}] + 0.0031$  | 0.9970                    |
| <b>Total phenolic acids expressed in<br/>caffeic acid</b> | Absorption = $0.0581 \cdot \text{conc}[\mu\text{g/mL}] + 0.1473$ | 0.9855                    |
| <b>Trolox / FRAP</b>                                      | Absorption = $6.0343 \cdot \text{conc}[\mu\text{M/g}] + 0.0186$  | 0.9920                    |
| <b>Trolox / CUPRAC</b>                                    | Absorption = $3.7061 \cdot \text{conc}[\mu\text{M/g}] + 0.0093$  | 0.9738                    |
